# Supplementary material
Source: PubMed Central journal article supplement (PMC6499644)
Supplement: NIHMS1017886-supplement-Supp_info.pdf [file NIHMS1017886-supplement-Supp_info.pdf]

**Table S1.** *ICAM4* genotypes observed in 60 Ethiopian individuals, 57 from Gambela and 3 from Addis Ababa

| Genotype number | Genotype* |           | Total |
|-----------------|-----------|-----------|-------|
|                 | rs3093030 | rs5030384 |       |
| NG_007728.1     | C/C       | G/G       | 54†   |
| 01              | C/T       | G/G       | 3     |
| 02              | C/C       | G/A       | 2     |
| 03              | T/T       | G/G       | 1†    |

\* The nucleotides at the 2 SNP positions are shown in 5'- to 3'- orientation (see Table 2). The remaining 1,918 nucleotide positions that we determined had no variation relative to the reference sequence NG\_007728.1. The genotypes in red show homozygous and heterozygous variations with respect to the reference sequence NG\_007728.1.

† 3 samples drawn in Addis Ababa:<sup>3</sup> 2 samples with genotype NG\_007728.1 and 1 sample with genotype number 03.

**Table S2.** Genetic variations detected in *ICAM4* gene in 60 Ethiopian individuals, 57 from Gambela and 3 from Addis Ababa

| Location | Nucleotide change* | dbSNP reference no. | Observations in present study (n=60) |                      |                    |       | HWE (p) | Caucasian VAF <sup>2</sup> | African American VAF <sup>2</sup> | Global VAF <sup>†</sup> |
|----------|--------------------|---------------------|--------------------------------------|----------------------|--------------------|-------|---------|----------------------------|-----------------------------------|-------------------------|
|          |                    |                     | Homozygote reference                 | Heterozygote variant | Homozygote variant | VAF   |         |                            |                                   |                         |
| Promoter | c.-286C>T          | rs3093030           | 56                                   | 3                    | 1                  | 0.042 | 0.004‡  | 0.361                      | 0.143                             | 0.320                   |
| Intron 1 | c.394+7G>A         | rs5030384           | 58                                   | 2                    | 0                  | 0.017 | 0.896   | 0.000                      | 0.000                             | 0.004                   |

\* Nucleotide substitutions are shown relative to the reference sequence (NG\_007728.1). Nucleotide positions are defined using the first nucleotide of the coding sequence (CDs) of NM\_001544.5 isoform 1 as nucleotide position 1

† Global VAF from 1000Genome, TOPMed ([nhlbiwgs.org](http://nhlbiwgs.org)) and gnomAD (<http://gnomad.broadinstitute.org/>) databases

‡ A p value of <0.05 indicates a deviation from the Hardy Weinberg Equilibrium (HWE), see main text for explanation.

VAF – variant allele frequency

HWE – Hardy-Weinberg equilibrium
